# Supplementary material for: Early remission is associated with improved survival in patients with inflammatory polyarthritis: results from the Norfolk Arthritis Register
Source: PubMed Central journal article supplement — Ann Rheum Dis. 2013 Jun 7;73(9):1677–82. doi: 10.1136/annrheumdis-2013-203339 (PMC4145442; doi:10.1136/annrheumdis-2013-203339), 2013-06-07
Supplement: annrheumdis-2013-203339-s1.pdf [file annrheumdis-2013-203339-s1.pdf]

**Table 1S. Occurrence of clinical remission within the first 3 years of follow-up.**

|                                                                                                                                                                                                                                                                                                                           | <i>Remission 1</i> | <i>Remission 2</i> | <i>Remission 3</i> |
|---------------------------------------------------------------------------------------------------------------------------------------------------------------------------------------------------------------------------------------------------------------------------------------------------------------------------|--------------------|--------------------|--------------------|
| <b>Remission ever, n(%)</b>                                                                                                                                                                                                                                                                                               | 384 (30.7)         | 483 (38.6)         | 677 (54.1)         |
| <b>Remission score, n(%)</b>                                                                                                                                                                                                                                                                                              |                    |                    |                    |
| <b>1</b>                                                                                                                                                                                                                                                                                                                  | 220 (17.6)         | 263 (21.0)         | 306 (24.5)         |
| <b>2</b>                                                                                                                                                                                                                                                                                                                  | 95 (7.6)           | 128 (10.2)         | 190 (15.2)         |
| <b>3</b>                                                                                                                                                                                                                                                                                                                  | 69 (5.5)           | 92 (7.3)           | 181 (14.5)         |
| <b>Time to first remission, n(%)</b>                                                                                                                                                                                                                                                                                      |                    |                    |                    |
| <b>1st year</b>                                                                                                                                                                                                                                                                                                           | 168 (13.4)         | 217 (17.3)         | 355 (28.4)         |
| <b>2nd year</b>                                                                                                                                                                                                                                                                                                           | 118 (9.4)          | 145 (11.6)         | 202 (16.1)         |
| <b>3rd year</b>                                                                                                                                                                                                                                                                                                           | 98 (7.8)           | 121 (9.7)          | 120 (9.6)          |
| <p><i>Evaluated on complete data on remission of 1,251 subjects</i><br/> <i>Remission 1: swollen joint count on 51 + tender joint count 51 = 0; Remission 2: swollen joint count on 28 + tender joint count on 28 = 0;</i><br/> <i>Remission 3: swollen joint count on 28 ≤ 1 &amp; tender joint count on 28 ≤ 1.</i></p> |                    |                    |                    |

**Table 2S. Effect of remission according to different definitions of remission on all-cause mortality**

|                                                                                                                                                                                                                                                                                                                                                                                                                                                                                                                                                                                                                   |                | <i>Remission 1</i>            |                               | <i>Remission 2</i>            |                               | <i>Remission 3</i>            |                               |
|-------------------------------------------------------------------------------------------------------------------------------------------------------------------------------------------------------------------------------------------------------------------------------------------------------------------------------------------------------------------------------------------------------------------------------------------------------------------------------------------------------------------------------------------------------------------------------------------------------------------|----------------|-------------------------------|-------------------------------|-------------------------------|-------------------------------|-------------------------------|-------------------------------|
|                                                                                                                                                                                                                                                                                                                                                                                                                                                                                                                                                                                                                   |                | <i>HR [95%CI]<sup>§</sup></i> | <i>HR [95%CI]<sup>#</sup></i> | <i>HR [95%CI]<sup>§</sup></i> | <i>HR [95%CI]<sup>#</sup></i> | <i>HR [95%CI]<sup>§</sup></i> | <i>HR [95%CI]<sup>#</sup></i> |
| <b>Ever in remission</b>                                                                                                                                                                                                                                                                                                                                                                                                                                                                                                                                                                                          |                | 0.73 [0.56, 0.94]             | 0.72 [0.55, 0.94]             | 0.73 [0.58, 0.93]             | 0.73 [0.57, 0.93]             | 0.79 [0.63, 0.99]             | 0.82 [0.64, 1.03]             |
| <b>Remission score</b>                                                                                                                                                                                                                                                                                                                                                                                                                                                                                                                                                                                            |                | 0.86 [0.74, 0.99]             | 0.85 [0.73, 0.99]             | 0.87 [0.76, 0.99]             | 0.86 [0.75, 0.99]             | 0.88 [0.79, 0.98]             | 0.89 [0.79, 1.00]             |
| <b>Time to 1<sup>st</sup> remission</b>                                                                                                                                                                                                                                                                                                                                                                                                                                                                                                                                                                           | <b>1 year</b>  | 0.68 [0.46, 0.98]             | 0.65 [0.60, 0.71]             | 0.65 [0.46, 0.91]             | 0.63 [0.44, 0.90]             | 0.76 [0.57, 1.00]             | 0.80 [0.59, 1.09]             |
|                                                                                                                                                                                                                                                                                                                                                                                                                                                                                                                                                                                                                   | <b>2 years</b> | 0.61 [0.40, 0.91]             | 0.56 [0.51, 0.61]             | 0.72 [0.50, 1.04]             | 0.67 [0.46, 0.98]             | 0.81 [0.59, 1.11]             | 0.78 [0.56, 1.07]             |
|                                                                                                                                                                                                                                                                                                                                                                                                                                                                                                                                                                                                                   | <b>3 years</b> | 0.95 [0.65, 1.40]             | 1.03 [0.95, 1.12]             | 0.86 [0.60, 1.24]             | 0.92 [0.64, 1.33]             | 0.82 [0.57, 1.19]             | 0.91 [0.63, 1.31]             |
| <p><i>HR: hazard ratio</i><br/> <i>Remission 1: swollen joint count on 51 + tender joint count 51 = 0; Remission 2: swollen joint count on 28 + tender joint count on 28 = 0; Remission 3: swollen joint count on 28 ≤1 &amp; tender joint count on 28 ≤1;</i><br/> <sup>§</sup> <i>adjusted for age, gender</i><br/> <sup>#</sup> <i>adjusted for age, gender, smoke, RF, previous and/or concurrent treatment with DMARDs; symptoms duration at baseline; swollen joints at baseline; CRP levels at baseline and HAQ at baseline and calendar</i><br/> <i>based on multiple imputation of missing data.</i></p> |                |                               |                               |                               |                               |                               |                               |

**Table 3S. Effect of remission according to different definitions of remission on all-cause mortality on overall survival, restricted to patients classified as RA according to 1987 ACR Criteria or to patients ever treated with DMARDs.**

|                                                                                                                                                                                                                                                                                                                                                                                                                                                                                                                                                                                                                        | <i>Remission 1</i>            |                               | <i>Remission 2</i>            |                               | <i>Remission 3</i>            |                               |
|------------------------------------------------------------------------------------------------------------------------------------------------------------------------------------------------------------------------------------------------------------------------------------------------------------------------------------------------------------------------------------------------------------------------------------------------------------------------------------------------------------------------------------------------------------------------------------------------------------------------|-------------------------------|-------------------------------|-------------------------------|-------------------------------|-------------------------------|-------------------------------|
|                                                                                                                                                                                                                                                                                                                                                                                                                                                                                                                                                                                                                        | <i>HR [95%CI]<sup>§</sup></i> | <i>HR [95%CI]<sup>#</sup></i> | <i>HR [95%CI]<sup>§</sup></i> | <i>HR [95%CI]<sup>#</sup></i> | <i>HR [95%CI]<sup>§</sup></i> | <i>HR [95%CI]<sup>#</sup></i> |
| <b>Men (431)</b>                                                                                                                                                                                                                                                                                                                                                                                                                                                                                                                                                                                                       | 0.66 [0.47, 0.92]             | 0.63 [0.44, 0.90]             | 0.70 [0.51, 0.99]             | 0.67 [0.47, 0.96]             | 0.66 [0.47, 0.93]             | 0.64 [0.48, 0.92]             |
| <b>RA (914)</b>                                                                                                                                                                                                                                                                                                                                                                                                                                                                                                                                                                                                        | 0.71 [0.52, 0.96]             | 0.64 [0.43, 0.92]             | 0.70 [0.53, 0.93]             | 0.67 [0.49, 0.89]             | 0.78 [0.61, 1.01]             | 0.77 [0.59, 1.00]             |
| <b>Ever on DMARDs (723)</b>                                                                                                                                                                                                                                                                                                                                                                                                                                                                                                                                                                                            | 0.59 [0.41, 0.84]             | 0.59 [0.41, 0.86]             | 0.65 [0.47, 0.91]             | 0.67 [0.48, 0.96]             | 0.76 [0.56, 1.03]             | 0.83 [0.61, 1.16]             |
| <p><i>HR: hazard ratio</i><br/> <i>Remission 1: swollen joint count on 51 + tender joint count on 51 = 0; Remission 2: swollen joint count on 28 + tender joint count on 28 = 0; Remission 3: swollen joint count on 28 ≤ 1 &amp; tender joint count on 28 ≤ 1;</i><br/> <sup>§</sup> <i>adjusted for age, gender</i><br/> <sup>#</sup> <i>adjusted for age, gender, smoke, RF, previous and/or concurrent treatment with DMARDs; symptoms duration at baseline; swollen joints at baseline; CRP levels at baseline and HAQ at baseline and calendar</i><br/> <i>based on multiple imputation of missing data.</i></p> |                               |                               |                               |                               |                               |                               |
